# Supplementary material for: Chimeric Tobamoviruses With Coat Protein Exchanges Modulate Symptom Expression and Defence Responses in Nicotiana tabacum
Source: Front Microbiol. 2020 Nov 6;11:587005. doi: 10.3389/fmicb.2020.587005 (PMC7677242; doi:10.3389/fmicb.2020.587005)
Supplement: Supplementary file 4 [file Table_1.XLSX]

## Sheet: Sheet1
Primer name	Sequence of primer
T-CG-CP+	CGTTTTAAATATGGCTTACAATCCGATCAC
T-CG-CP-	TTGACTACCCTAAGCTTTCGAGGTGGTAGC
T-PM-CP+	CGTTTTAAATATGGCTTACACAGTTTCCAG
T-PM-CP-	CTTGACTACCTTAAGGAGTTGTAGCCCAGG
TMV-CG+	AAAGCTTAGGGTAGTCAAGATGCATAATAAATAAC
TMV-CG-	TGTAAGCCATATTTAAAACGAATCCGATTC
TMV-PM+	ACTCCTTAAGGTAGTCAAGATGCATAATAAATAAC
TMV-PM-	TGTAAGCCATATTTAAAACGAATCCGATTC
TMV-CP+	TCTCTCTACAAGATCTATGTCTTACAGTATCACTAC
TMV-Myc-CP-	GCAGAATTCGAAGCTTCAGTTGCAGGACCAGAGGTCC
PMMoV-CP+	TCTCTCTACAAGATCTATGGCTTACACAGTTTCCAG
PMMoV-Myc-CP-	GCAGAATTCGAAGCTTCAGGAGTTGTAGCCCAGGTGAG
CGMMV-CP+	TCTCTCTACAAGATCTATGGCTTACAATCCGATC
CGMMV-Myc-CP-	GCAGAATTCGAAGCTTCAGCTTTCGAGGTGGTAGCC
TMVfsCP+	TTTTAAATACGTCTTACAGTATCACTACTC
TMVfsCP-	ACTGTAAGACGTATTTAAAACGAATCCG
T-CGCP-fsCP+	TTCGTTTTAAATACGGCTTACAATCCGATC
T-CGCP-fsCP-	GTAAGCCGTATTTAAAACGAATCCGATTCGGCG
T-PMCP-fsCP+	GATTCGTTTTAAATACGGCTTACACAGTTTCCAG
T-PMCP-fsCP-	GTGTAAGCCGTATTTAAAACGAATCCGATTCGG
TMV+	ATCGGTCAGTGCCGAACAAG
TMV-	CGCACCACGTGTGATTACGG
Actin+	CAAGGAAATCACCGCTTTGG
Actin-	AAGGGATGCGAGGATGGA
