# Supplementary material for: Chimeric Tobamoviruses With Coat Protein Exchanges Modulate Symptom Expression and Defence Responses in Nicotiana tabacum
Source: Front Microbiol. 2020 Nov 6;11:587005. doi: 10.3389/fmicb.2020.587005 (PMC7677242; doi:10.3389/fmicb.2020.587005)
Supplement: Supplementary file 7 [file Table_4.XLSX]

## Sheet: TMV vs TMV-CGCP
#Total_gene	38051	3962
#GO_classify1	GO_classify2	GO_ID	AllGene_number	Selected_gene_number	Selected_gene_ID
biological process	metabolic process	GO:0008152	18354	1983	gene40467;gene40859;gene22945;gene42427;gene41443;gene2368;gene50739;gene34531;gene20831;gene12498;gene7997;gene10103;gene41736;gene41528;gene3466;gene48413;Nicotiana_tabacum_newGene_25239;gene32239;gene45382;gene38066;gene51599;gene48983;gene51601;gene47520;gene63610;gene11270;gene36750;gene48440;gene33745;Nicotiana_tabacum_newGene_25631;gene6839;gene28979;gene34052;gene3764;gene51032;gene24907;…
biological process	cellular process	GO:0009987	17558	1669	gene38287;gene14715;gene11598;gene10198;gene4135;gene52876;gene42391;gene45944;gene749;gene29901;gene59154;Nicotiana_tabacum_newGene_6625;gene40217;gene43209;gene4600;gene10638;gene17039;gene61027;gene64247;gene18264;gene1114;gene61250;gene16147;gene71610;gene10410;gene31901;gene9111;gene39808;gene68121;gene38511;gene66272;Nicotiana_tabacum_newGene_4893;gene21859;gene18424;gene44298;gene33405;gen…
biological process	single-organism process	GO:0044699	12275	1407	gene27332;gene42624;gene18770;gene20014;gene67675;gene536;gene27782;gene52228;gene61092;gene35221;Nicotiana_tabacum_newGene_35928;gene19347;gene44070;gene60567;gene26193;gene19326;gene20699;gene32681;gene11155;gene7861;gene6716;gene19968;gene40517;gene32809;gene25984;gene66727;gene47488;gene3043;gene70255;gene68004;gene26350;gene19588;gene17449;gene45298;gene23519;gene13798;Nicotiana_tabacum_newG…
biological process	biological regulation	GO:0065007	6684	656	gene51538;gene14715;gene54071;gene58979;gene15166;gene25591;gene59154;gene66866;gene25654;gene10638;gene4600;gene61027;gene51931;gene69440;gene73086;gene27714;gene71610;gene34540;gene42394;gene68121;gene9111;gene48090;gene44298;gene18424;gene115;gene46241;gene38802;gene35471;gene33018;gene13183;gene35953;gene49912;gene17983;gene7356;gene30821;gene26522;gene35155;gene2262;gene1797;gene61809;gene46…
biological process	response to stimulus	GO:0050896	4714	590	gene62993;gene37758;gene37293;gene39931;gene45755;gene14213;gene43772;gene26450;gene50552;gene58924;gene36958;gene29178;gene3728;gene35940;gene24679;gene59307;gene24203;gene42346;gene60112;gene41577;gene68248;gene29085;Nicotiana_tabacum_newGene_6890;gene41918;gene54260;gene40608;gene40481;gene30000;gene34965;gene22512;gene39305;gene6221;gene52598;gene57308;gene63882;gene2342;gene41954;Nicotiana_t…
biological process	localization	GO:0051179	4524	500	gene25530;gene13719;gene24114;gene8668;gene43873;gene14174;gene22446;gene20321;gene935;gene44977;gene65934;gene41044;gene62359;gene67789;gene37916;gene45135;gene3902;gene38461;gene48756;gene61797;Nicotiana_tabacum_newGene_41137;gene51831;gene53540;gene10600;gene30776;gene29892;gene57738;gene28215;gene43744;gene5448;gene30873;gene23381;gene19373;gene32040;Nicotiana_tabacum_newGene_1527;gene28369;g…
biological process	cellular component organization or biogenesis	GO:0071840	3495	181	gene69082;gene69222;gene67247;gene68837;gene13632;gene71658;gene7699;gene53907;gene65689;gene7435;gene46678;gene2262;gene20492;gene11213;gene66921;gene45517;Nicotiana_tabacum_newGene_12111;gene45847;gene31233;gene30676;gene23706;gene28543;gene54071;gene29852;gene27857;gene8635;gene51177;gene45439;gene7080;gene66121;gene40406;gene68121;gene1087;gene58377;gene10149;gene31578;gene65626;gene34690;gen…
biological process	developmental process	GO:0032502	1426	126	gene29178;gene36682;gene2666;gene68835;gene20421;gene40815;gene43696;gene28428;gene67536;gene17504;gene18395;gene26584;gene15217;gene53689;gene64338;gene6861;gene34690;gene59500;gene33389;gene64576;gene43032;gene45416;gene32884;gene45055;gene38898;gene22994;gene16144;gene51877;gene61329;gene13038;gene53994;gene7347;gene28093;gene14240;gene9831;gene7981;gene46647;gene55600;gene55677;gene30244;gene…
biological process	signaling	GO:0023052	1398	164	gene68868;gene30000;gene20450;gene46125;gene38303;gene56743;gene29775;gene2389;gene71407;gene6616;gene60664;gene26184;gene7577;gene49632;gene3375;gene48358;gene53540;gene30083;gene15152;gene47645;gene5317;gene59500;gene71429;gene43772;gene59614;gene45755;gene22550;gene53689;gene37293;gene37758;gene41929;gene43696;gene42346;gene64469;gene60112;gene52755;gene29178;gene49461;gene35940;gene9220;gene7…
biological process	multicellular organismal process	GO:0032501	1069	74	gene22994;gene13038;gene53994;gene28093;gene52657;gene7981;gene46647;gene38898;gene59837;gene157;gene50705;gene45545;gene40849;gene21088;gene1039;gene26275;gene72252;gene45415;gene13273;gene28428;gene49746;gene50277;gene67536;gene17504;gene18395;gene29178;gene36682;gene20421;gene59500;gene33389;gene45416;gene32884;gene15217;gene53689;gene64338;gene6861;gene45006;gene765;gene43066;gene53418;gene59…
biological process	reproduction	GO:0000003	863	89	gene66277;gene10702;gene45416;gene45055;gene59500;gene64576;gene9990;gene9907;Nicotiana_tabacum_newGene_31624;gene11225;gene9083;gene6861;gene54364;gene15217;gene53689;gene64338;gene9991;gene46647;gene51337;gene55677;gene22994;gene16144;gene9831;gene2342;gene30331;gene45837;gene31259;gene23919;gene62572;gene26275;gene1039;gene70486;gene157;gene51060;gene2148;gene25977;gene65896;gene60082;gene7225…
biological process	reproductive process	GO:0022414	852	89	gene48399;gene56801;gene48433;gene39006;gene72858;gene68004;gene23215;gene19588;gene30014;gene21944;gene49571;gene3043;gene10701;gene23791;gene1687;gene13632;gene6841;gene8464;gene69082;gene26648;gene58038;gene24010;gene5436;gene7871;gene73571;gene56140;gene38511;gene53907;gene36676;gene20014;gene6839;gene16661;gene18770;gene45234;gene21651;gene765;gene2436;gene5806;gene20825;gene3498;gene47963;g…
biological process	detoxification	GO:0098754	402	73	gene37771;gene3842;gene32132;gene26450;gene1842;Nicotiana_tabacum_newGene_14562;gene13746;gene28496;gene17010;gene25146;gene20486;gene37293;gene69923;gene41929;gene7936;gene68248;gene60970;gene43774;gene4132;gene56880;gene71760;gene67249;Nicotiana_tabacum_newGene_32354;gene311;gene17043;gene14017;gene56158;gene41918;gene46681;gene46712;gene56519;gene38286;gene41954;gene65480;gene10291;gene39016;g…
biological process	multi-organism process	GO:0051704	402	59	Nicotiana_tabacum_newGene_11797;gene5806;gene56854;gene20680;gene55677;gene52671;gene45006;gene28093;gene9831;gene14691;gene31743;gene1777;gene57049;gene48703;gene60067;gene67645;gene60726;gene14715;gene31713;gene65896;gene5124;gene31072;gene52022;gene36942;gene73530;gene39542;gene60112;Nicotiana_tabacum_newGene_35722;gene46312;gene61900;gene38693;gene17504;gene67169;gene11213;gene3407;gene23215;…
biological process	growth	GO:0040007	225	24	gene18770;gene36563;gene22888;gene703;gene58377;gene46647;gene17504;gene51877;gene43696;gene32722;gene31578;gene69222;gene486;gene9462;gene58079;gene6166;gene53689;gene14715;gene57099;gene45416;gene66841;gene37365;gene70139;gene50705
biological process	immune system process	GO:0002376	162	30	gene16366;gene72877;gene11771;gene52671;Nicotiana_tabacum_newGene_39927;gene28093;Nicotiana_tabacum_newGene_6890;gene3407;gene48320;gene31743;gene52598;gene9220;gene51380;gene29178;gene67645;gene52781;gene62385;gene12167;gene22597;gene7175;gene48010;gene29003;gene25157;gene19428;gene16576;gene51510;gene1828;gene19605;gene73530;gene39931
biological process	cell killing	GO:0001906	40	7	gene57049;gene38693;Nicotiana_tabacum_newGene_16609;Nicotiana_tabacum_newGene_11797;gene5124;gene71530;gene67169
biological process	locomotion	GO:0040011	19	0
biological process	rhythmic process	GO:0048511	18	0
biological process	biological adhesion	GO:0022610	7	0
cellular component	cell	GO:0005623	18329	1496	gene41874;gene27328;gene41708;gene63896;gene24929;gene58212;gene54923;gene65697;gene17738;gene41407;gene53919;gene21081;gene23215;gene26837;gene60698;gene66507;gene2118;gene52654;gene61537;gene37324;gene32910;gene24228;gene65401;gene53102;gene9462;gene39484;gene16920;gene15493;gene9800;gene12259;gene4670;Nicotiana_tabacum_newGene_41566;gene14051;gene43855;gene61429;gene1486;gene12542;gene44698;ge…
cellular component	cell part	GO:0044464	18210	1480	gene7872;gene70315;gene59570;gene31722;gene50799;gene39001;gene29833;gene59343;gene59375;gene8878;gene49551;gene44454;gene21847;gene30366;gene73117;Nicotiana_tabacum_newGene_9028;gene64744;gene45204;Nicotiana_tabacum_newGene_7925;gene10232;gene72437;gene64793;gene5965;gene48433;gene22413;gene22888;gene49865;gene57367;gene40327;Nicotiana_tabacum_newGene_21103;Nicotiana_tabacum_newGene_33080;gene57…
cellular component	membrane	GO:0016020	13659	1646	gene18040;gene6894;gene59730;gene36173;gene69793;gene66126;gene70429;gene61197;gene37771;gene7944;gene24919;gene53128;gene70688;gene3758;gene60522;gene60060;gene49431;gene18764;gene36637;gene50695;gene55934;gene29168;gene13761;gene42249;gene65640;gene72965;gene34643;gene33868;gene36724;gene53805;gene52673;gene20603;gene28217;gene69337;gene36102;gene38436;gene32275;gene7144;gene10647;gene38946;gen…
cellular component	organelle	GO:0043226	12506	798	gene29142;gene37020;gene20711;gene40728;Nicotiana_tabacum_newGene_28485;gene51032;gene31540;gene34052;gene62925;gene20519;gene43040;gene23977;gene19914;Nicotiana_tabacum_newGene_28356;Nicotiana_tabacum_newGene_24394;gene22930;gene24120;gene66713;gene65410;gene49032;gene70491;gene52047;gene3498;gene9471;gene42427;gene31362;Nicotiana_tabacum_newGene_30039;gene68615;gene1003;gene24372;gene47520;gene…
cellular component	membrane part	GO:0044425	11358	1402	gene44698;gene12542;gene20168;gene50721;gene25357;gene19625;gene53414;gene39833;gene66257;gene14108;gene18977;gene14730;gene27735;gene9267;gene57849;gene1041;gene46467;gene65710;gene51459;gene2118;gene61537;gene52654;gene61966;gene10336;gene53919;gene23215;gene33168;gene26837;gene21081;gene54923;gene55651;gene41407;gene36698;gene41708;gene41874;gene72746;gene8781;gene11278;gene15493;gene36604;gen…
cellular component	organelle part	GO:0044422	5779	252	gene69136;gene3928;Nicotiana_tabacum_newGene_32188;gene1385;gene15412;gene33212;gene4643;Nicotiana_tabacum_newGene_36475;gene24682;gene9658;gene68945;gene66460;gene36034;gene52986;gene42549;gene55467;gene1039;gene19024;gene37354;gene63851;gene45069;gene3753;gene5291;gene67938;gene48963;gene10642;gene38286;gene1720;gene54117;gene32275;gene63949;gene28614;gene7596;gene68704;gene24423;gene37433;gene…
cellular component	macromolecular complex	GO:0032991	4450	125	gene72600;gene42219;gene58212;gene2594;gene63896;gene72437;gene48771;Nicotiana_tabacum_newGene_35730;Nicotiana_tabacum_newGene_24394;gene24120;gene20492;gene19905;gene21477;gene24994;gene10;gene26522;gene49032;gene45120;gene4724;gene54933;gene45815;gene53102;gene13024;gene38327;gene68926;gene23289;gene21865;gene59342;gene67282;Nicotiana_tabacum_newGene_28485;gene51032;gene33972;gene47160;gene2395…
cellular component	extracellular region	GO:0005576	995	176	gene36099;gene12285;gene39645;gene53897;gene41954;gene56519;Nicotiana_tabacum_newGene_5987;gene52598;Nicotiana_tabacum_newGene_20943;gene69935;gene34965;gene57242;gene43791;gene66841;gene33562;gene58097;gene8940;gene17988;gene62321;gene67169;gene69923;gene16808;Nicotiana_tabacum_newGene_6890;gene49874;gene35940;gene25802;gene48453;gene2897;gene56880;gene48320;gene1909;gene46138;gene64576;gene2849…
cellular component	membrane-enclosed lumen	GO:0031974	816	24	gene23194;gene48413;gene10819;gene49032;gene24423;gene21651;gene7080;gene45330;gene48963;gene36303;gene43140;gene12453;gene48478;gene59746;gene51174;gene50705;gene36034;gene1039;gene42549;gene6166;gene15412;gene54933;gene73430;gene45815
cellular component	cell junction	GO:0030054	538	81	gene1544;gene36910;gene62701;gene40437;gene2017;gene49874;gene73125;Nicotiana_tabacum_newGene_19162;gene56970;Nicotiana_tabacum_newGene_18212;gene8787;gene27901;gene54364;gene15217;gene19073;gene15122;gene35929;gene22658;gene64576;gene9907;gene48347;gene2342;gene56496;gene9792;gene30331;Nicotiana_tabacum_newGene_21067;gene62572;gene55677;gene12281;gene9831;gene55524;gene23194;gene24643;gene29814;…
cellular component	supramolecular complex	GO:0099080	200	20	gene14242;gene3965;gene58543;gene59375;Nicotiana_tabacum_newGene_36258;gene16416;gene19254;gene64026;gene3438;gene40327;gene46998;gene23310;gene20682;gene69291;gene4724;gene45815;gene9660;gene45799;gene48115;gene70475
cellular component	extracellular region part	GO:0044421	132	32	Nicotiana_tabacum_newGene_6625;gene33868;gene17988;gene38657;gene58097;Nicotiana_tabacum_newGene_17269;gene35676;gene1828;gene36099;gene11771;gene15640;gene10572;Nicotiana_tabacum_newGene_20943;gene52598;Nicotiana_tabacum_newGene_5987;gene53897;gene46990;gene3842;gene46138;gene72248;gene29003;gene39931;gene65292;gene16366;gene68053;gene45484;gene15456;gene72465;gene8130;gene39230;gene48320;gene22…
cellular component	virion	GO:0019012	64	0
cellular component	virion part	GO:0044423	64	0
cellular component	nucleoid	GO:0009295	31	1	gene55467
molecular function	binding	GO:0005488	18486	1885	gene45648;gene36724;gene34643;gene33868;gene52673;gene72252;gene47019;gene8944;gene63567;gene33232;gene59837;gene141;gene38436;gene24682;gene69152;gene10647;gene66083;gene865;gene20691;gene50480;gene42207;gene58930;gene59744;gene13038;gene46086;gene7347;gene55244;gene18040;gene56138;gene72248;gene60556;gene59005;gene69793;gene51734;gene46333;gene71772;gene60425;gene66126;gene52572;gene24919;gene7…
molecular function	catalytic activity	GO:0003824	17644	2158	gene64759;gene45006;gene19048;gene43173;gene13486;gene7015;gene43140;gene40870;gene8821;gene50;gene29852;gene65993;gene53762;gene8999;gene57829;gene55728;gene20825;gene56993;gene30739;gene67767;gene4829;gene14366;gene29780;gene21953;gene45517;gene25524;gene55682;gene62814;gene4270;gene33974;gene37679;gene3467;gene62149;gene7699;gene66985;gene42849;gene16144;gene60956;gene5449;gene60182;gene25392;…
molecular function	transporter activity	GO:0005215	2502	340	gene32040;gene28369;gene29892;gene57738;gene28215;gene5448;gene43744;gene23381;gene51831;Nicotiana_tabacum_newGene_41137;gene53540;gene10600;gene37916;gene45135;gene3902;gene38461;gene48756;gene41044;gene44977;gene62359;gene22446;gene14174;gene935;gene8668;gene43873;gene13719;gene25530;gene24114;gene47113;gene39377;gene17752;gene11205;gene53695;gene59614;gene4862;gene53160;gene12276;gene39385;gen…
molecular function	structural molecule activity	GO:0005198	1130	47	gene1720;gene46998;gene27857;gene36170;gene60219;gene34821;gene1133;gene36339;gene22994;Nicotiana_tabacum_newGene_36258;gene16416;gene59375;gene57178;gene62471;gene62595;gene45799;gene43198;gene16216;gene30710;gene45915;gene9658;gene56349;gene57267;gene50375;gene29333;gene22;gene58856;gene25101;gene64026;gene2594;gene19254;gene60489;gene24994;gene3965;gene66217;gene64390;gene48115;gene57068;gene9…
molecular function	nucleic acid binding transcription factor activity	GO:0001071	1052	144	gene67854;gene33340;gene55575;gene24120;gene48771;gene61809;gene47230;gene16781;gene1797;gene35728;gene62925;gene46241;gene115;gene44274;Nicotiana_tabacum_newGene_28754;gene51931;gene47685;gene58895;gene44083;gene42394;gene12436;gene41624;gene43808;gene55866;gene31362;gene69972;gene50544;gene27996;gene3498;gene10551;gene34514;gene45997;gene1204;gene25654;gene39432;gene73157;gene71859;gene61837;ge…
molecular function	molecular function regulator	GO:0098772	668	61	gene62466;gene55692;gene16552;gene37356;gene16861;gene57050;gene42601;gene68824;gene47386;gene15649;gene69514;gene69486;gene48099;gene49483;gene25984;gene47698;gene30842;gene30304;gene1015;gene11785;gene35471;gene5125;gene313;gene37274;gene24883;gene35953;gene69665;gene58454;gene70290;gene30658;gene17245;gene25774;gene2461;gene2658;gene39032;gene47789;gene30845;gene20162;gene39645;gene3071;gene25…
molecular function	electron carrier activity	GO:0009055	355	43	gene38775;gene28591;gene78;gene61027;gene57744;gene21997;gene48963;gene47520;gene14300;gene44492;gene4548;gene1618;gene30083;gene21150;gene43817;gene54450;gene33460;gene32367;Nicotiana_tabacum_newGene_17043;Nicotiana_tabacum_newGene_19707;gene73095;gene12686;gene46760;gene59018;gene32921;gene72965;gene49045;gene71693;gene36032;gene47799;gene7861;gene65796;gene48639;gene42226;gene26196;gene7430;ge…
molecular function	signal transducer activity	GO:0004871	352	55	gene25020;gene10638;Nicotiana_tabacum_newGene_20550;gene73117;gene5008;gene8512;gene12434;gene56743;gene26193;gene20450;gene14715;gene9792;gene48703;Nicotiana_tabacum_newGene_38046;gene53540;gene62477;gene68569;gene61635;gene19659;gene25670;gene25464;gene51599;gene12846;gene1910;gene7577;gene3751;gene65401;gene15122;gene42125;gene12694;gene8910;gene62478;gene22964;gene37758;gene15152;gene26964;ge…
molecular function	antioxidant activity	GO:0016209	339	47	gene41382;gene41475;gene68837;gene73182;gene32910;gene25146;gene28496;gene16022;gene13746;gene41444;gene66199;gene46682;gene32132;gene3842;gene37771;gene16837;gene32681;gene57367;gene67249;gene56880;gene46658;gene4132;gene68053;gene60970;gene18081;gene53009;gene7936;gene69923;gene41929;gene25656;gene56158;gene66945;gene49551;gene835;gene14017;gene39720;gene55320;gene39016;gene10291;gene65480;gene…
molecular function	transcription factor activity, protein binding	GO:0000988	200	6	gene10819;gene60698;gene59746;gene32099;gene50324;gene16781
molecular function	molecular transducer activity	GO:0060089	180	34	gene42124;gene7356;gene58924;gene16552;gene3070;gene42601;gene9220;gene35940;gene73336;gene59614;Nicotiana_tabacum_newGene_36746;gene43772;gene26964;gene35471;gene37758;gene22964;gene42125;gene65401;gene69665;gene3751;gene6616;gene25670;gene2389;gene25464;gene68569;gene53540;gene62477;gene14715;gene18147;gene5008;gene26353;gene73117;Nicotiana_tabacum_newGene_20550;gene16246
molecular function	nutrient reservoir activity	GO:0045735	86	6	gene68053;gene47868;gene35502;gene35445;gene45298;gene3842
molecular function	protein tag	GO:0031386	13	0
molecular function	metallochaperone activity	GO:0016530	11	0

## Sheet: TMV vs TMV-PMCP
#Total_gene	37945	2737
#GO_classify1	GO_classify2	GO_ID	AllGene_number	Selected_gene_number	Selected_gene_ID
biological process	metabolic process	GO:0008152	18296	1380	gene42060;gene60279;gene7572;gene53162;gene42907;gene21852;gene9659;gene36371;gene32497;gene30448;gene59726;gene19593;gene765;gene29003;gene56684;gene58355;gene62226;gene47331;gene7395;gene17383;gene41312;gene67321;gene14800;gene70911;gene69785;gene1414;gene9179;Nicotiana_tabacum_newGene_5982;gene1645;gene2342;gene32100;gene27173;gene41744;gene51862;gene46125;gene54355;gene32569;gene65954;gene234…
biological process	cellular process	GO:0009987	17518	1201	gene71490;gene15152;gene21573;gene1910;gene65947;gene12823;gene71429;gene23086;gene1841;gene15249;gene40406;gene39645;gene15382;gene32119;gene25180;Nicotiana_tabacum_newGene_33946;gene71407;gene45365;gene31589;gene53489;gene46771;Nicotiana_tabacum_newGene_30200;gene53128;gene36284;gene19379;gene29780;gene12584;gene72319;gene27938;gene42125;gene18478;gene59375;gene60424;gene29325;gene29642;gene242…
biological process	single-organism process	GO:0044699	12246	945	gene30924;gene43776;gene60976;gene26299;gene57546;gene54515;gene22535;gene5842;gene56420;gene61092;gene35502;gene2898;gene46044;gene16552;gene46392;gene2484;Nicotiana_tabacum_newGene_26639;gene36744;gene20153;gene61366;gene64576;gene4318;gene10768;gene4188;gene19778;gene11598;gene20656;gene59148;gene73463;gene22024;gene27943;gene43774;gene46864;gene3466;gene44953;gene33470;gene32910;gene66083;gen…
biological process	biological regulation	GO:0065007	6676	521	gene59307;gene6517;gene27532;gene17842;gene60425;gene26353;gene34843;gene41038;gene17624;gene2389;gene60784;gene72402;gene27167;gene49534;gene60112;gene6977;gene48340;gene73915;gene26522;gene59746;gene22426;gene28390;gene49531;gene38684;gene26637;gene27880;gene73157;Nicotiana_tabacum_newGene_21530;gene59679;gene8999;gene27988;gene20164;gene25654;gene50594;gene18675;gene19577;gene10046;gene17641;g…
biological process	response to stimulus	GO:0050896	4704	491	gene26450;gene68843;gene37300;gene67711;gene12955;gene53083;gene3646;gene13486;gene37293;gene3407;gene41745;gene41577;gene58506;gene51348;gene36560;gene35155;gene6964;gene62477;gene25157;gene73336;gene26733;gene57048;gene26239;gene53006;gene73416;gene41918;gene5824;gene26159;gene69076;gene52202;gene40922;gene14213;gene311;gene64579;gene12846;gene62476;gene55292;gene70524;gene61703;gene47541;gene7…
biological process	localization	GO:0051179	4515	351	gene73336;gene43744;gene68277;gene20629;gene41785;gene14213;gene62476;gene66501;gene1434;gene22434;gene61606;gene36256;gene26340;gene19373;gene44135;gene60489;gene41303;gene62477;gene12011;gene28543;gene5660;gene56349;gene52654;gene10125;gene36458;gene29683;Nicotiana_tabacum_newGene_40653;gene48347;gene67977;gene30776;gene63827;gene25611;gene30969;gene44277;gene12162;gene60117;gene60404;gene30170…
biological process	cellular component organization or biogenesis	GO:0071840	3493	110	gene67881;gene63978;gene58685;gene39536;gene53953;gene21209;gene45517;gene29099;gene32722;gene1645;gene16391;gene67091;gene30676;gene54515;gene30901;gene30924;gene27172;gene46647;gene18383;gene43791;gene70430;gene26239;gene70817;gene37771;gene45847;gene62714;gene39014;gene25592;gene4670;gene69922;gene71946;gene4719;gene49162;gene31233;gene42907;gene33972;gene18267;gene28543;gene60082;gene16792;ge…
biological process	developmental process	GO:0032502	1424	75	gene3407;gene67711;gene46125;gene53994;gene58290;gene32722;gene21621;gene60976;gene52202;gene67091;gene51877;gene30924;gene46647;gene31211;gene3498;gene68386;gene48407;gene55677;gene66080;gene6166;gene62714;gene23791;gene65410;gene61703;gene13003;gene765;gene64576;Nicotiana_tabacum_newGene_24029;gene31233;gene60082;gene9380;gene59090;gene20656;gene59500;gene36756;gene35472;gene7871;gene53907;gene…
biological process	signaling	GO:0023052	1397	149	gene13746;gene8796;gene68868;gene45584;gene18170;gene3070;gene38303;gene51510;gene59500;gene9380;gene13183;gene42346;gene49185;gene49912;gene42601;gene8999;gene21271;gene27988;gene49461;gene61018;gene12846;gene62476;gene311;gene64579;gene59102;gene26159;gene73416;gene16427;gene73336;gene40895;gene62477;gene12553;gene1425;gene35155;gene51348;gene41745;gene3407;gene37293;gene44488;gene3646;gene4551…
biological process	multicellular organismal process	GO:0032501	1067	48	gene68023;gene27167;gene31233;Nicotiana_tabacum_newGene_24029;gene49746;gene59090;gene59500;gene15217;gene36756;gene5371;gene66080;gene6166;gene50277;gene26434;gene45416;gene62714;gene65410;gene53418;gene61703;gene28428;gene13003;gene765;gene12574;gene1204;gene52202;gene60976;gene46647;gene57431;gene44277;gene68386;gene29178;gene22864;gene48407;gene18395;gene55644;gene3407;gene28093;gene17504;gen…
biological process	reproduction	GO:0000003	861	55	gene6839;gene56140;gene62572;gene6861;gene16243;gene22597;gene36334;gene9907;gene21621;gene17821;gene2342;gene47963;gene67091;gene52202;gene25977;gene46647;gene20825;gene31211;gene9990;gene8974;gene3498;gene23919;gene9991;gene2436;gene55677;gene10702;gene30014;gene8464;gene23791;gene45416;gene62714;gene13003;gene765;gene58038;gene3043;gene69136;gene5436;gene2149;gene64576;gene20014;gene45837;gene…
biological process	reproductive process	GO:0022414	850	55	gene15217;gene53907;gene45234;gene35472;gene7871;gene36756;gene5371;gene45055;gene59090;gene2148;gene60082;gene49571;gene59500;gene20656;gene45837;gene2149;gene64576;gene20014;gene765;gene58038;gene69136;gene3043;gene5436;gene13003;gene23791;gene45416;gene62714;gene10702;gene30014;gene8464;gene23919;gene9991;gene2436;gene55677;gene8974;gene9990;gene3498;gene46647;gene20825;gene31211;gene67091;gen…
biological process	detoxification	GO:0098754	403	47	gene67249;gene835;gene14800;gene41918;gene10198;Nicotiana_tabacum_newGene_10717;gene41954;gene39720;gene14017;gene311;gene43776;gene57689;gene26450;gene10291;gene28496;gene48337;gene37293;Nicotiana_tabacum_newGene_29631;gene46712;gene23648;gene56519;gene60279;gene64020;gene35578;gene43777;gene18081;gene13746;gene1841;gene38286;gene15249;gene26565;gene32520;gene1842;gene32910;gene68248;gene41929;g…
biological process	multi-organism process	GO:0051704	401	41	gene36847;gene9220;gene20680;gene57049;gene30821;gene44732;gene64126;gene1777;gene60067;gene67645;gene11213;gene56854;gene64576;gene36942;gene60726;gene46312;gene27414;gene29417;gene31743;gene5124;gene28093;gene3407;gene60112;gene67169;gene17504;gene61899;gene14691;gene61900;gene48703;gene44488;gene52022;gene31713;gene45819;gene52671;gene57431;gene36958;gene29178;Nicotiana_tabacum_newGene_33545;g…
biological process	growth	GO:0040007	225	16	gene36756;gene25626;gene46647;gene30924;gene37365;gene67091;gene51877;gene32722;gene14164;gene39786;gene17504;gene45416;gene50705;gene31578;gene6166;gene70872
biological process	immune system process	GO:0002376	162	23	gene52781;gene73530;gene26239;gene27414;gene51510;gene52598;gene29178;gene19428;gene51380;gene25157;gene19605;gene12167;gene67645;gene52671;gene16366;gene29003;gene22597;gene1828;gene72877;gene31743;gene3407;gene9220;gene28093
biological process	cell killing	GO:0001906	40	3	gene5124;gene57049;gene67169
biological process	locomotion	GO:0040011	19	0
biological process	rhythmic process	GO:0048511	18	0
biological process	biological adhesion	GO:0022610	7	0
cellular component	cell	GO:0005623	18298	1173	gene35502;gene50559;gene65750;gene32923;gene10956;gene2252;gene43776;gene9068;gene39485;gene56420;gene43774;gene69745;gene55467;gene43174;gene65859;gene20153;gene48865;gene4188;gene19778;gene12164;gene11598;gene59148;gene39492;gene58650;gene32856;gene11696;gene5384;gene31713;gene2118;gene62106;gene71859;Nicotiana_tabacum_newGene_37260;gene58212;gene45382;gene52671;Nicotiana_tabacum_newGene_22121;…
cellular component	cell part	GO:0044464	18179	1160	gene32600;Nicotiana_tabacum_newGene_17287;gene59829;gene41092;gene21346;gene23328;gene25140;gene45204;gene36856;gene62465;gene61520;gene10009;gene59018;gene72877;gene5006;gene43746;gene13467;gene13991;gene39230;gene26939;gene41962;gene64793;Nicotiana_tabacum_newGene_5640;gene73204;gene36034;gene67938;gene47834;gene20885;gene8878;gene21751;gene7246;gene37614;gene43879;gene7250;Nicotiana_tabacum_ne…
cellular component	membrane	GO:0016020	13623	1207	gene19087;gene50961;gene8855;gene28605;gene67505;gene65368;gene32890;gene58770;gene6733;gene61605;gene36337;gene9292;gene14986;gene53953;gene39085;gene2070;gene8280;gene41909;Nicotiana_tabacum_newGene_17877;gene62994;gene22964;gene3600;gene45837;gene45650;gene16038;gene15288;gene30014;gene71795;gene54249;gene899;gene58256;gene58088;gene1536;gene28851;gene10012;gene58038;gene33570;gene66942;gene23…
cellular component	organelle	GO:0043226	12485	703	gene27572;gene31290;gene25157;gene55836;gene71432;gene10360;gene26159;gene53006;gene35340;gene26512;gene63928;gene52202;gene40922;gene57789;gene47685;gene68843;gene66430;gene53083;gene10878;gene3407;gene33675;gene72337;gene32275;gene16792;gene22955;gene62206;gene56759;gene2797;gene45028;gene42085;gene10572;gene22957;gene60988;gene6099;gene13564;gene27780;gene8796;gene61018;gene61703;gene51949;gen…
cellular component	membrane part	GO:0044425	11332	1039	gene22776;gene163;gene60270;gene9641;gene30698;gene11270;gene72779;gene10306;gene25802;gene44007;gene45836;gene23877;gene69338;gene18006;gene53863;gene70993;gene11599;gene50176;gene19968;gene5852;gene70624;gene47799;gene1930;gene4227;gene55172;gene19377;gene64128;gene67386;gene68121;gene32809;gene30713;gene10487;gene19190;gene24725;gene70695;gene42193;gene47894;gene42490;gene14088;gene5419;gene23…
cellular component	organelle part	GO:0044422	5767	287	gene10878;gene32275;gene39785;gene12011;gene72337;gene12955;gene53083;gene62463;gene68557;gene57789;gene55836;gene27572;gene26239;gene53006;gene35340;gene60755;gene39482;gene6383;gene25611;gene42567;gene39014;gene61703;gene6099;gene11069;gene22957;gene13564;gene61435;gene32648;gene22955;gene9660;gene16792;gene71518;gene22990;gene60756;gene23890;gene54844;gene50375;gene7737;gene63622;gene61080;gen…
cellular component	macromolecular complex	GO:0032991	4444	156	gene55716;gene10819;gene25817;gene28851;gene24278;gene71946;gene23679;gene56757;gene53864;gene48865;gene33972;gene3600;gene14228;gene39492;Nicotiana_tabacum_newGene_26438;gene12164;Nicotiana_tabacum_newGene_19704;gene9663;gene50278;gene65750;gene11755;gene9292;gene50559;gene14986;gene21209;gene2252;gene40666;gene10956;gene15559;gene50961;gene9179;gene44954;gene71517;gene57588;gene50177;gene45913;…
cellular component	extracellular region	GO:0005576	993	115	gene5221;gene46990;gene8130;gene375;gene57050;gene2223;gene50363;gene56519;gene72465;gene22617;gene10572;Nicotiana_tabacum_newGene_6064;gene5061;gene33868;gene4719;gene64576;gene40071;gene69922;gene16317;gene27326;gene64126;gene72028;gene72147;gene2897;gene29003;gene899;gene34965;gene17988;gene45847;gene37771;gene68361;gene22930;gene44710;gene55677;Nicotiana_tabacum_newGene_10717;gene35445;gene25…
cellular component	membrane-enclosed lumen	GO:0031974	816	15	gene12453;gene36034;gene59746;gene50112;gene61435;gene36303;gene48963;gene10819;gene57588;gene13564;gene50705;Nicotiana_tabacum_newGene_14966;gene42549;gene44954;gene6166
cellular component	cell junction	GO:0030054	538	47	gene52246;gene64285;gene30014;gene15122;gene73125;gene48347;gene70524;gene35704;gene765;Nicotiana_tabacum_newGene_16987;gene5436;gene64576;Nicotiana_tabacum_newGene_14966;gene2149;Nicotiana_tabacum_newGene_17877;Nicotiana_tabacum_newGene_19153;gene22658;gene15999;gene28543;gene49571;gene2148;gene2223;gene15217;gene65947;Nicotiana_tabacum_newGene_19704;gene39313;gene56140;gene10376;gene58506;gene3…
cellular component	supramolecular complex	GO:0099080	200	5	gene32856;gene9660;gene21551;gene16490;gene59375
cellular component	extracellular region part	GO:0044421	132	30	gene375;gene52598;gene50363;gene33748;gene39230;gene46990;gene8130;gene15640;gene10572;Nicotiana_tabacum_newGene_6064;gene65292;gene33868;gene55522;gene46138;gene72465;gene15639;gene36099;gene16366;Nicotiana_tabacum_newGene_5449;gene29003;gene1828;gene40071;gene38657;gene35676;gene22930;gene71190;gene58097;Nicotiana_tabacum_newGene_5448;gene17988;Nicotiana_tabacum_newGene_16153
cellular component	virion	GO:0019012	64	0
cellular component	virion part	GO:0044423	64	0
cellular component	nucleoid	GO:0009295	31	1	gene55467
molecular function	binding	GO:0005488	18435	1306	gene45755;gene935;gene47729;gene19272;gene10155;gene67808;gene23984;gene69505;gene54438;gene38129;gene6134;gene44808;gene26434;gene20243;gene57378;gene37365;Nicotiana_tabacum_newGene_27272;gene66916;gene5776;gene36382;gene53916;gene10800;gene57143;gene55770;gene65038;gene73601;gene13086;gene13372;gene5851;gene60568;gene9877;gene56757;gene2356;gene12434;gene53864;gene15940;gene9244;gene66322;gene2…
molecular function	catalytic activity	GO:0003824	17594	1364	gene50798;gene54670;gene52192;gene36687;gene39720;gene73500;gene6457;gene31357;gene37237;gene10198;gene35514;gene48930;gene4404;gene25485;gene11026;Nicotiana_tabacum_newGene_33208;gene56965;Nicotiana_tabacum_newGene_28716;gene10376;gene10291;gene65233;gene46529;Nicotiana_tabacum_newGene_8924;gene17821;gene308;gene67056;gene19806;gene48004;gene45096;gene55562;gene40217;gene21574;gene66058;gene6681…
molecular function	transporter activity	GO:0005215	2499	240	gene65519;gene14213;gene20629;gene22161;gene1434;gene66501;gene62476;gene50892;gene43744;gene73336;gene68660;gene70312;gene29030;gene68277;Nicotiana_tabacum_newGene_34073;gene52239;gene21142;gene41303;gene12011;gene62477;gene1425;gene36256;gene61606;gene1486;gene22434;gene28215;gene31625;gene12281;gene8213;gene52443;gene44135;gene32722;gene35909;gene18675;gene53521;gene36458;gene53695;gene11361;g…
molecular function	structural molecule activity	GO:0005198	1130	26	gene7250;gene30710;gene30615;gene58651;gene10125;gene9660;gene56349;gene70430;gene20656;gene32536;gene67282;gene56591;gene59375;gene15559;gene20076;gene12000;gene29273;gene14164;gene60489;gene6162;gene2252;gene25723;gene21551;gene63622;gene50375;gene24994
molecular function	nucleic acid binding transcription factor activity	GO:0001071	1050	117	gene71859;gene12015;gene53492;gene37365;gene34514;gene52615;gene70258;gene12436;Nicotiana_tabacum_newGene_26845;gene35008;gene56580;gene55108;gene73530;gene57045;gene73157;gene67900;gene44083;gene65038;gene6977;gene1797;gene5384;gene5961;gene58630;gene9178;gene29046;gene28390;gene49531;gene34843;Nicotiana_tabacum_newGene_26996;gene47729;gene17624;gene25626;gene46333;gene60784;gene67645;gene62924;…
molecular function	molecular function regulator	GO:0098772	667	39	gene15640;gene49274;gene375;gene21646;gene57050;gene26565;gene2389;gene9926;gene55522;gene35152;gene68824;gene3963;gene9877;gene39645;gene43020;gene26353;gene40034;gene42601;gene8818;gene26159;gene1015;gene7416;gene15639;gene47698;gene45308;gene24652;gene31197;gene30901;gene47386;gene44221;gene161;gene2636;gene58454;gene14180;gene66762;gene16552;gene2461;gene6879;gene63365
molecular function	electron carrier activity	GO:0009055	355	29	gene51493;gene71693;gene73095;gene41092;gene53673;gene29185;gene18823;gene26196;gene33460;gene41572;gene62895;gene47799;gene51979;gene17842;gene8048;gene59018;gene34882;gene21997;gene20434;gene48963;gene61027;gene32856;gene15683;gene30083;gene48340;gene72337;gene46760;gene1743;gene26195
molecular function	signal transducer activity	GO:0004871	351	44	gene56743;gene61471;gene12694;gene37758;gene46771;Nicotiana_tabacum_newGene_34512;gene15122;gene9220;gene1910;gene3070;gene15152;gene2613;gene12434;gene3751;gene4188;gene22964;gene45512;Nicotiana_tabacum_newGene_19205;gene48703;gene52633;gene54415;gene41744;gene12955;gene26193;gene51599;gene55299;gene35155;gene1425;gene62477;Nicotiana_tabacum_newGene_33208;gene60112;gene41745;gene19659;gene62478;…
molecular function	antioxidant activity	GO:0016209	340	29	gene35578;gene18081;gene41954;gene39720;gene14017;gene38286;gene26565;gene13746;gene835;gene56519;gene67249;gene14800;Nicotiana_tabacum_newGene_10717;gene979;gene28496;gene10291;gene37771;gene48337;gene21546;gene68837;Nicotiana_tabacum_newGene_29631;gene32910;gene57689;gene32520;gene66945;gene39016;gene44953;gene69922;gene41929
molecular function	transcription factor activity, protein binding	GO:0000988	200	9	gene68386;gene66258;gene33114;gene12574;gene59746;gene10819;gene53492;gene58355;gene3876
molecular function	molecular transducer activity	GO:0060089	180	28	gene3751;gene53540;gene42125;gene22964;gene9877;gene62476;gene57431;gene2389;gene73336;gene2613;gene26159;gene3070;gene9220;gene16552;gene42601;gene6879;gene1425;gene62477;Nicotiana_tabacum_newGene_33208;Nicotiana_tabacum_newGene_34512;gene46771;gene55299;gene37758;gene2636;gene52633;gene26353;gene12955;Nicotiana_tabacum_newGene_19205
molecular function	nutrient reservoir activity	GO:0045735	86	6	gene42497;gene35445;gene35502;gene45298;gene2223;gene70230
molecular function	protein tag	GO:0031386	13	0
molecular function	metallochaperone activity	GO:0016530	11	0
