# Supplementary material for: Chimeric Tobamoviruses With Coat Protein Exchanges Modulate Symptom Expression and Defence Responses in Nicotiana tabacum
Source: Front Microbiol. 2020 Nov 6;11:587005. doi: 10.3389/fmicb.2020.587005 (PMC7677242; doi:10.3389/fmicb.2020.587005)
Supplement: Supplementary file 8 [file Table_5.XLSX]

## Sheet: TMV vs TMV-CGCP
#Kegg_pathway	ko_id	Cluster_frequency	Genome_frequency	P-value	Corrected_P-value	rich_factor
Plant-pathogen interaction	ko04626	96 out of 1010 9.5049504950495%	422 out of 11839 3.56449024410845%	0	0	2.66657
Glutathione metabolism	ko00480	56 out of 1010 5.54455445544554%	213 out of 11839 1.79913844074668%	1.37002e-13	1.64402e-11	3.08178
Flavonoid biosynthesis	ko00941	24 out of 1010 2.37623762376238%	96 out of 11839 0.810879297237942%	1.11748e-06	0.000134097	2.93045
Phenylpropanoid biosynthesis	ko00940	66 out of 1010 6.53465346534653%	435 out of 11839 3.67429681560943%	2.52724e-06	0.000303269	1.77848
Plant hormone signal transduction	ko04075	89 out of 1010 8.81188118811881%	681 out of 11839 5.75217501478165%	2.56646e-05	0.00307975	1.53192
Cysteine and methionine metabolism	ko00270	40 out of 1010 3.96039603960396%	253 out of 11839 2.13700481459583%	9.70235e-05	0.0116428	1.85325
Phenylalanine metabolism	ko00360	21 out of 1010 2.07920792079208%	104 out of 11839 0.878452572007771%	0.000156168	0.0187402	2.3669
Stilbenoid, diarylheptanoid and gingerol biosynthesis	ko00945	15 out of 1010 1.48514851485149%	68 out of 11839 0.574372835543543%	0.000495912	0.0595094	2.58569
Sesquiterpenoid and triterpenoid biosynthesis	ko00909	10 out of 1010 0.99009900990099%	36 out of 11839 0.304079736464228%	0.000634724	0.0761669	3.25605
Fatty acid metabolism	ko01212	29 out of 1010 2.87128712871287%	189 out of 11839 1.5964186164372%	0.00136729	0.164075	1.79858
Fatty acid degradation	ko00071	19 out of 1010 1.88118811881188%	107 out of 11839 0.903792550046457%	0.00163368	0.196042	2.08144
Histidine metabolism	ko00340	13 out of 1010 1.28712871287129%	63 out of 11839 0.5321395388124%	0.00219719	0.263662	2.41878
Biotin metabolism	ko00780	11 out of 1010 1.08910891089109%	50 out of 11839 0.422332967311428%	0.00277358	0.332829	2.57879
Other glycan degradation	ko00511	9 out of 1010 0.891089108910891%	37 out of 11839 0.312526395810457%	0.00322138	0.386566	2.85124
Fatty acid biosynthesis	ko00061	19 out of 1010 1.88118811881188%	114 out of 11839 0.962919165470057%	0.00344872	0.413846	1.95363
Tryptophan metabolism	ko00380	15 out of 1010 1.48514851485149%	84 out of 11839 0.7095193850832%	0.00458616	0.550339	2.09318
Monobactam biosynthesis	ko00261	6 out of 1010 0.594059405940594%	20 out of 11839 0.168933186924571%	0.00518281	0.621937	3.51653
Glyoxylate and dicarboxylate metabolism	ko00630	27 out of 1010 2.67326732673267%	190 out of 11839 1.60486527578343%	0.00581019	0.697222	1.66573
Flavone and flavonol biosynthesis	ko00944	3 out of 1010 0.297029702970297%	7 out of 11839 0.0591266154236%	0.0166788	1	5.02362
Synthesis and degradation of ketone bodies	ko00072	4 out of 1010 0.396039603960396%	18 out of 11839 0.152039868232114%	0.0614201	1	2.60484
Glycosphingolipid biosynthesis - globo series	ko00603	4 out of 1010 0.396039603960396%	19 out of 11839 0.160486527578343%	0.0727518	1	2.46774
AGE-RAGE signaling pathway in diabetic complications	ko04933	7 out of 1010 0.693069306930693%	37 out of 11839 0.312526395810457%	0.0345262	1	2.21763
Limonene and pinene degradation	ko00903	2 out of 1010 0.198019801980198%	11 out of 11839 0.0929132528085142%	0.240286	1	2.13123
Lysine biosynthesis	ko00300	5 out of 1010 0.495049504950495%	29 out of 11839 0.244953121040628%	0.0959925	1	2.021
Cutin, suberine and wax biosynthesis	ko00073	14 out of 1010 1.38613861386139%	82 out of 11839 0.692626066390742%	0.00904234	1	2.00128
Tropane, piperidine and pyridine alkaloid biosynthesis	ko00960	10 out of 1010 0.99009900990099%	60 out of 11839 0.506799560773714%	0.029333	1	1.95363
Biosynthesis of unsaturated fatty acids	ko01040	11 out of 1010 1.08910891089109%	67 out of 11839 0.565926176197314%	0.0254107	1	1.92447
Butanoate metabolism	ko00650	10 out of 1010 0.99009900990099%	61 out of 11839 0.515246220119943%	0.0325054	1	1.9216
Nicotinate and nicotinamide metabolism	ko00760	8 out of 1010 0.792079207920792%	49 out of 11839 0.4138863079652%	0.0537794	1	1.91376
Steroid biosynthesis	ko00100	13 out of 1010 1.28712871287129%	85 out of 11839 0.717966044429428%	0.027396	1	1.79274
Sulfur metabolism	ko00920	12 out of 1010 1.18811881188119%	81 out of 11839 0.684179407044514%	0.0412068	1	1.73656
Tyrosine metabolism	ko00350	15 out of 1010 1.48514851485149%	102 out of 11839 0.861559253315314%	0.0258792	1	1.72379
Lysine degradation	ko00310	11 out of 1010 1.08910891089109%	75 out of 11839 0.633499450967142%	0.0524024	1	1.71919
ABC transporters	ko02010	9 out of 1010 0.891089108910891%	63 out of 11839 0.5321395388124%	0.0853426	1	1.67454
Phenylalanine, tyrosine and tryptophan biosynthesis	ko00400	17 out of 1010 1.68316831683168%	119 out of 11839 1.0051524622012%	0.0239799	1	1.67454
Sphingolipid metabolism	ko00600	9 out of 1010 0.891089108910891%	64 out of 11839 0.540586198158628%	0.092198	1	1.64838
Galactose metabolism	ko00052	19 out of 1010 1.88118811881188%	137 out of 11839 1.15719233043331%	0.0235245	1	1.62565
Ubiquinone and other terpenoid-quinone biosynthesis	ko00130	13 out of 1010 1.28712871287129%	98 out of 11839 0.8277726159304%	0.0727005	1	1.55493
Carotenoid biosynthesis	ko00906	10 out of 1010 0.99009900990099%	76 out of 11839 0.641946110313371%	0.110848	1	1.54234
Glycerolipid metabolism	ko00561	20 out of 1010 1.98019801980198%	154 out of 11839 1.3007855393192%	0.0381965	1	1.52231
Alanine, aspartate and glutamate metabolism	ko00250	18 out of 1010 1.78217821782178%	141 out of 11839 1.19097896781823%	0.0545464	1	1.4964
Glucosinolate biosynthesis	ko00966	2 out of 1010 0.198019801980198%	16 out of 11839 0.135146549539657%	0.401697	1	1.46522
Amino sugar and nucleotide sugar metabolism	ko00520	42 out of 1010 4.15841584158416%	350 out of 11839 2.95633077118%	0.0148709	1	1.40661
Nitrogen metabolism	ko00910	12 out of 1010 1.18811881188119%	100 out of 11839 0.844665934622857%	0.14345	1	1.40661
Selenocompound metabolism	ko00450	6 out of 1010 0.594059405940594%	50 out of 11839 0.422332967311428%	0.251679	1	1.40661
Peroxisome	ko04146	26 out of 1010 2.57425742574257%	219 out of 11839 1.84981839682406%	0.0529675	1	1.39163
Regulation of autophagy	ko04140	9 out of 1010 0.891089108910891%	77 out of 11839 0.6503927696596%	0.208149	1	1.37008
Terpenoid backbone biosynthesis	ko00900	15 out of 1010 1.48514851485149%	130 out of 11839 1.09806571500971%	0.141594	1	1.35251
Pyruvate metabolism	ko00620	27 out of 1010 2.67326732673267%	235 out of 11839 1.98496494636371%	0.0684468	1	1.34676
Brassinosteroid biosynthesis	ko00905	3 out of 1010 0.297029702970297%	27 out of 11839 0.228059802348171%	0.408441	1	1.30242
alpha-Linolenic acid metabolism	ko00592	13 out of 1010 1.28712871287129%	118 out of 11839 0.996705802854971%	0.205339	1	1.29138
beta-Alanine metabolism	ko00410	12 out of 1010 1.18811881188119%	111 out of 11839 0.937579187431371%	0.236484	1	1.26722
Glycolysis / Gluconeogenesis	ko00010	34 out of 1010 3.36633663366337%	315 out of 11839 2.660697694062%	0.0907938	1	1.26521
Glycine, serine and threonine metabolism	ko00260	18 out of 1010 1.78217821782178%	168 out of 11839 1.4190387701664%	0.186556	1	1.25591
Isoquinoline alkaloid biosynthesis	ko00950	6 out of 1010 0.594059405940594%	57 out of 11839 0.481459582735028%	0.358656	1	1.23387
Phagosome	ko04145	23 out of 1010 2.27722772277228%	221 out of 11839 1.86671171551651%	0.185621	1	1.21991
Vitamin B6 metabolism	ko00750	3 out of 1010 0.297029702970297%	29 out of 11839 0.244953121040628%	0.455052	1	1.2126
Valine, leucine and isoleucine degradation	ko00280	15 out of 1010 1.48514851485149%	146 out of 11839 1.23321226454937%	0.262782	1	1.20429
Diterpenoid biosynthesis	ko00904	8 out of 1010 0.792079207920792%	81 out of 11839 0.684179407044514%	0.387106	1	1.15771
Arginine and proline metabolism	ko00330	13 out of 1010 1.28712871287129%	134 out of 11839 1.13185235239463%	0.355898	1	1.13719
Porphyrin and chlorophyll metabolism	ko00860	10 out of 1010 0.99009900990099%	104 out of 11839 0.878452572007771%	0.394796	1	1.12709
Fructose and mannose metabolism	ko00051	15 out of 1010 1.48514851485149%	157 out of 11839 1.32612551735788%	0.362138	1	1.11992
Biosynthesis of amino acids	ko01230	55 out of 1010 5.44554455445545%	582 out of 11839 4.91595573950503%	0.227657	1	1.10773
Linoleic acid metabolism	ko00591	4 out of 1010 0.396039603960396%	43 out of 11839 0.363206351887828%	0.505721	1	1.0904
Protein processing in endoplasmic reticulum	ko04141	54 out of 1010 5.34653465346535%	581 out of 11839 4.9075090801588%	0.270503	1	1.08946
Circadian rhythm - plant	ko04712	11 out of 1010 1.08910891089109%	119 out of 11839 1.0051524622012%	0.436803	1	1.08353
Arginine biosynthesis	ko00220	8 out of 1010 0.792079207920792%	87 out of 11839 0.734859363121885%	0.466848	1	1.07787
Glycosphingolipid biosynthesis - ganglio series	ko00604	1 out of 1010 0.099009900990099%	11 out of 11839 0.0929132528085142%	0.625184	1	1.06562
Pentose and glucuronate interconversions	ko00040	24 out of 1010 2.37623762376238%	266 out of 11839 2.2468113860968%	0.4178	1	1.0576
SNARE interactions in vesicular transport	ko04130	9 out of 1010 0.891089108910891%	100 out of 11839 0.844665934622857%	0.484677	1	1.05496
Ascorbate and aldarate metabolism	ko00053	9 out of 1010 0.891089108910891%	102 out of 11839 0.861559253315314%	0.509079	1	1.03427
Starch and sucrose metabolism	ko00500	49 out of 1010 4.85148514851485%	560 out of 11839 4.730129233888%	0.447645	1	1.02566
Carbon metabolism	ko01200	56 out of 1010 5.54455445544554%	648 out of 11839 5.47343525635611%	0.480304	1	1.01299
Propanoate metabolism	ko00640	9 out of 1010 0.891089108910891%	109 out of 11839 0.920685868738914%	0.591179	1	0.967854
Carbon fixation in photosynthetic organisms	ko00710	16 out of 1010 1.58415841584158%	195 out of 11839 1.64709857251457%	0.603065	1	0.961787
Ether lipid metabolism	ko00565	5 out of 1010 0.495049504950495%	62 out of 11839 0.523692879466171%	0.618769	1	0.945305
Other types of O-glycan biosynthesis	ko00514	1 out of 1010 0.099009900990099%	13 out of 11839 0.109806571500971%	0.686465	1	0.901676
One carbon pool by folate	ko00670	4 out of 1010 0.396039603960396%	52 out of 11839 0.439226286003885%	0.658415	1	0.901676
Taurine and hypotaurine metabolism	ko00430	2 out of 1010 0.198019801980198%	27 out of 11839 0.228059802348171%	0.68359	1	0.86828
Pantothenate and CoA biosynthesis	ko00770	5 out of 1010 0.495049504950495%	72 out of 11839 0.608159472928457%	0.746532	1	0.814013
Glycerophospholipid metabolism	ko00564	15 out of 1010 1.48514851485149%	216 out of 11839 1.82447841878537%	0.832595	1	0.814013
Phosphatidylinositol signaling system	ko04070	12 out of 1010 1.18811881188119%	180 out of 11839 1.52039868232114%	0.851255	1	0.781452
Pentose phosphate pathway	ko00030	9 out of 1010 0.891089108910891%	139 out of 11839 1.17408564912577%	0.848671	1	0.758964
Endocytosis	ko04144	27 out of 1010 2.67326732673267%	442 out of 11839 3.73342343103303%	0.978207	1	0.716036
N-Glycan biosynthesis	ko00510	7 out of 1010 0.693069306930693%	118 out of 11839 0.996705802854971%	0.886124	1	0.69536
Monoterpenoid biosynthesis	ko00902	1 out of 1010 0.099009900990099%	17 out of 11839 0.143593208885886%	0.780628	1	0.689517
Base excision repair	ko03410	7 out of 1010 0.693069306930693%	119 out of 11839 1.0051524622012%	0.891098	1	0.689517
Valine, leucine and isoleucine biosynthesis	ko00290	4 out of 1010 0.396039603960396%	68 out of 11839 0.574372835543543%	0.843033	1	0.689517
2-Oxocarboxylic acid metabolism	ko01210	9 out of 1010 0.891089108910891%	154 out of 11839 1.3007855393192%	0.917425	1	0.685039
Cyanoamino acid metabolism	ko00460	7 out of 1010 0.693069306930693%	121 out of 11839 1.02204578089366%	0.900499	1	0.67812
Arachidonic acid metabolism	ko00590	2 out of 1010 0.198019801980198%	35 out of 11839 0.295633077118%	0.812315	1	0.669816
Ubiquitin mediated proteolysis	ko04120	19 out of 1010 1.88118811881188%	343 out of 11839 2.8972041557564%	0.986777	1	0.649312
Fatty acid elongation	ko00062	4 out of 1010 0.396039603960396%	78 out of 11839 0.658839429005828%	0.909077	1	0.601117
RNA degradation	ko03018	14 out of 1010 1.38613861386139%	273 out of 11839 2.3059380015204%	0.988655	1	0.601117
Citrate cycle (TCA cycle)	ko00020	7 out of 1010 0.693069306930693%	143 out of 11839 1.20787228651069%	0.965837	1	0.573794
Inositol phosphate metabolism	ko00562	8 out of 1010 0.792079207920792%	172 out of 11839 1.45282540755131%	0.982823	1	0.545199
Folate biosynthesis	ko00790	2 out of 1010 0.198019801980198%	46 out of 11839 0.388546329926514%	0.912909	1	0.509643
Photosynthesis	ko00195	6 out of 1010 0.594059405940594%	140 out of 11839 1.182532308472%	0.983189	1	0.502362
Glycosaminoglycan degradation	ko00531	2 out of 1010 0.198019801980198%	47 out of 11839 0.396992989272743%	0.918957	1	0.498799
Thiamine metabolism	ko00730	1 out of 1010 0.099009900990099%	24 out of 11839 0.202719824309486%	0.882615	1	0.488408
Proteasome	ko03050	6 out of 1010 0.594059405940594%	164 out of 11839 1.38525213278148%	0.995967	1	0.428846
Zeatin biosynthesis	ko00908	3 out of 1010 0.297029702970297%	86 out of 11839 0.726412703775657%	0.981233	1	0.408899
Protein export	ko03060	4 out of 1010 0.396039603960396%	117 out of 11839 0.988259143508742%	0.991921	1	0.400745
Purine metabolism	ko00230	13 out of 1010 1.28712871287129%	390 out of 11839 3.29419714502914%	0.999991	1	0.390726
mRNA surveillance pathway	ko03015	9 out of 1010 0.891089108910891%	316 out of 11839 2.66914435340823%	0.999992	1	0.333848
Oxidative phosphorylation	ko00190	9 out of 1010 0.891089108910891%	329 out of 11839 2.7789509249092%	0.999997	1	0.320657
Ribosome	ko03010	19 out of 1010 1.88118811881188%	786 out of 11839 6.63907424613565%	1	1	0.283351
RNA transport	ko03013	11 out of 1010 1.08910891089109%	466 out of 11839 3.93614325534251%	1	1	0.276694
Aminoacyl-tRNA biosynthesis	ko00970	4 out of 1010 0.396039603960396%	171 out of 11839 1.44437874820508%	0.999821	1	0.274194
Ribosome biogenesis in eukaryotes	ko03008	5 out of 1010 0.495049504950495%	216 out of 11839 1.82447841878537%	0.999968	1	0.271338
Basal transcription factors	ko03022	2 out of 1010 0.198019801980198%	112 out of 11839 0.946025846777599%	0.999494	1	0.209318
Glycosylphosphatidylinositol(GPI)-anchor biosynthesis	ko00563	1 out of 1010 0.099009900990099%	58 out of 11839 0.489906242081257%	0.9944	1	0.2021
Pyrimidine metabolism	ko00240	5 out of 1010 0.495049504950495%	306 out of 11839 2.58467775994594%	1	1	0.191532
Photosynthesis - antenna proteins	ko00196	1 out of 1010 0.099009900990099%	65 out of 11839 0.549032857504857%	0.99701	1	0.180335
Nucleotide excision repair	ko03420	3 out of 1010 0.297029702970297%	196 out of 11839 1.6555452318608%	0.999996	1	0.179415
Mismatch repair	ko03430	2 out of 1010 0.198019801980198%	141 out of 11839 1.19097896781823%	0.999954	1	0.166266
Spliceosome	ko03040	7 out of 1010 0.693069306930693%	497 out of 11839 4.1979896950756%	1	1	0.165096
DNA replication	ko03030	2 out of 1010 0.198019801980198%	170 out of 11839 1.43593208885886%	0.999996	1	0.137903
RNA polymerase	ko03020	1 out of 1010 0.099009900990099%	110 out of 11839 0.929132528085142%	0.999948	1	0.106562
Homologous recombination	ko03440	1 out of 1010 0.099009900990099%	146 out of 11839 1.23321226454937%	0.999998	1	0.0802862

## Sheet: TMV vs TMV-PMCP
#Kegg_pathway	ko_id	Cluster_frequency	Genome_frequency	P-value	Corrected_P-value	rich_factor
Photosynthesis	ko00195	48 out of 744 6.45161290322581%	139 out of 11817 1.17627147330118%	0	0	5.4848
Plant-pathogen interaction	ko04626	77 out of 744 10.3494623655914%	422 out of 11817 3.57112634340357%	0	0	2.89809
Photosynthesis - antenna proteins	ko00196	55 out of 744 7.39247311827957%	65 out of 11817 0.55005500550055%	1.28805e-56	1.4555e-54	13.4395
Glutathione metabolism	ko00480	39 out of 744 5.24193548387097%	213 out of 11817 1.8024879411018%	1.19739e-09	1.35305e-07	2.90817
Plant hormone signal transduction	ko04075	73 out of 744 9.81182795698925%	679 out of 11817 5.74595921130575%	3.80014e-06	0.000429416	1.7076
Porphyrin and chlorophyll metabolism	ko00860	20 out of 744 2.68817204301075%	104 out of 11817 0.88008800880088%	6.2171e-06	0.000702533	3.05444
Sulfur metabolism	ko00920	15 out of 744 2.01612903225806%	81 out of 11817 0.685453160700685%	0.000138254	0.0156227	2.94131
Glycosphingolipid biosynthesis - globo series	ko00603	6 out of 744 0.806451612903226%	19 out of 11817 0.160785309300161%	0.00081486	0.0920791	5.0157
Stilbenoid, diarylheptanoid and gingerol biosynthesis	ko00945	10 out of 744 1.34408602150538%	67 out of 11817 0.566979774900567%	0.00874098	0.987731	2.37061
Flavone and flavonol biosynthesis	ko00944	2 out of 744 0.268817204301075%	7 out of 11817 0.0592366929000592%	0.0672921	1	4.53802
Monobactam biosynthesis	ko00261	4 out of 744 0.537634408602151%	20 out of 11817 0.169247694000169%	0.0336658	1	3.17661
Glycosphingolipid biosynthesis - ganglio series	ko00604	2 out of 744 0.268817204301075%	11 out of 11817 0.0930862317000931%	0.149464	1	2.88783
Other glycan degradation	ko00511	6 out of 744 0.806451612903226%	37 out of 11817 0.313108233900313%	0.0266434	1	2.57563
Butanoate metabolism	ko00650	8 out of 744 1.0752688172043%	60 out of 11817 0.507743082000508%	0.0334785	1	2.11774
Flavonoid biosynthesis	ko00941	12 out of 744 1.61290322580645%	95 out of 11817 0.803926546500804%	0.0158217	1	2.00628
Glucosinolate biosynthesis	ko00966	2 out of 744 0.268817204301075%	16 out of 11817 0.135398155200135%	0.266896	1	1.98538
Monoterpenoid biosynthesis	ko00902	2 out of 744 0.268817204301075%	17 out of 11817 0.143860539900144%	0.290825	1	1.8686
Synthesis and degradation of ketone bodies	ko00072	2 out of 744 0.268817204301075%	17 out of 11817 0.143860539900144%	0.290825	1	1.8686
Arginine and proline metabolism	ko00330	15 out of 744 2.01612903225806%	134 out of 11817 1.13395954980113%	0.021277	1	1.77795
Galactose metabolism	ko00052	15 out of 744 2.01612903225806%	137 out of 11817 1.15934670390116%	0.0254307	1	1.73902
Sphingolipid metabolism	ko00600	7 out of 744 0.940860215053763%	64 out of 11817 0.541592620800542%	0.106342	1	1.73721
Circadian rhythm - plant	ko04712	13 out of 744 1.74731182795699%	119 out of 11817 1.00702377930101%	0.0363896	1	1.73512
Fructose and mannose metabolism	ko00051	16 out of 744 2.1505376344086%	155 out of 11817 1.31166962850131%	0.0347866	1	1.63954
Selenocompound metabolism	ko00450	5 out of 744 0.672043010752688%	49 out of 11817 0.414656850300415%	0.193585	1	1.62072
Cysteine and methionine metabolism	ko00270	25 out of 744 3.36021505376344%	253 out of 11817 2.14098332910214%	0.0167807	1	1.56947
Carbon fixation in photosynthetic organisms	ko00710	19 out of 744 2.55376344086022%	194 out of 11817 1.64170263180164%	0.0367194	1	1.55556
Glycerolipid metabolism	ko00561	15 out of 744 2.01612903225806%	154 out of 11817 1.3032072438013%	0.0609797	1	1.54705
One carbon pool by folate	ko00670	5 out of 744 0.672043010752688%	52 out of 11817 0.44004400440044%	0.227928	1	1.52722
Pentose phosphate pathway	ko00030	13 out of 744 1.74731182795699%	138 out of 11817 1.16780908860117%	0.0944653	1	1.49623
Ubiquinone and other terpenoid-quinone biosynthesis	ko00130	9 out of 744 1.20967741935484%	98 out of 11817 0.829313700600829%	0.163362	1	1.45865
Limonene and pinene degradation	ko00903	1 out of 744 0.134408602150538%	11 out of 11817 0.0930862317000931%	0.511119	1	1.44391
beta-Alanine metabolism	ko00410	10 out of 744 1.34408602150538%	110 out of 11817 0.930862317000931%	0.154259	1	1.44391
Arachidonic acid metabolism	ko00590	3 out of 744 0.403225806451613%	35 out of 11817 0.296183464500296%	0.380027	1	1.36141
Sesquiterpenoid and triterpenoid biosynthesis	ko00909	3 out of 744 0.403225806451613%	35 out of 11817 0.296183464500296%	0.380027	1	1.36141
Terpenoid backbone biosynthesis	ko00900	11 out of 744 1.47849462365591%	129 out of 11817 1.09164762630109%	0.188938	1	1.35437
Glyoxylate and dicarboxylate metabolism	ko00630	16 out of 744 2.1505376344086%	189 out of 11817 1.5993907083016%	0.139429	1	1.3446
Tryptophan metabolism	ko00380	7 out of 744 0.940860215053763%	84 out of 11817 0.710840314800711%	0.277023	1	1.32359
Thiamine metabolism	ko00730	2 out of 744 0.268817204301075%	24 out of 11817 0.203097232800203%	0.45155	1	1.32359
Cyanoamino acid metabolism	ko00460	10 out of 744 1.34408602150538%	121 out of 11817 1.02394854870102%	0.231007	1	1.31265
Nitrogen metabolism	ko00910	8 out of 744 1.0752688172043%	99 out of 11817 0.837776085300838%	0.284507	1	1.28348
Phenylpropanoid biosynthesis	ko00940	34 out of 744 4.56989247311828%	434 out of 11817 3.67267495980367%	0.109129	1	1.2443
Fatty acid degradation	ko00071	8 out of 744 1.0752688172043%	106 out of 11817 0.897012778200897%	0.350886	1	1.19872
Brassinosteroid biosynthesis	ko00905	2 out of 744 0.268817204301075%	27 out of 11817 0.228484386900228%	0.514036	1	1.17652
Taurine and hypotaurine metabolism	ko00430	2 out of 744 0.268817204301075%	27 out of 11817 0.228484386900228%	0.514036	1	1.17652
Glycolysis / Gluconeogenesis	ko00010	23 out of 744 3.09139784946237%	314 out of 11817 2.65718879580266%	0.253947	1	1.16341
Ascorbate and aldarate metabolism	ko00053	7 out of 744 0.940860215053763%	101 out of 11817 0.854700854700855%	0.453198	1	1.10081
Phosphatidylinositol signaling system	ko04070	12 out of 744 1.61290322580645%	179 out of 11817 1.51476686130151%	0.454127	1	1.06479
Carotenoid biosynthesis	ko00906	5 out of 744 0.672043010752688%	76 out of 11817 0.643141237200643%	0.526108	1	1.04494
Glycerophospholipid metabolism	ko00564	14 out of 744 1.88172043010753%	216 out of 11817 1.82787509520183%	0.495222	1	1.02946
Ether lipid metabolism	ko00565	4 out of 744 0.537634408602151%	62 out of 11817 0.524667851400525%	0.553805	1	1.02471
Alanine, aspartate and glutamate metabolism	ko00250	9 out of 744 1.20967741935484%	140 out of 11817 1.18473385800118%	0.523843	1	1.02105
Glycosaminoglycan degradation	ko00531	3 out of 744 0.403225806451613%	47 out of 11817 0.397732080900398%	0.575104	1	1.01381
Carbon metabolism	ko01200	41 out of 744 5.51075268817204%	647 out of 11817 5.47516290090547%	0.50698	1	1.0065
Amino sugar and nucleotide sugar metabolism	ko00520	22 out of 744 2.95698924731183%	348 out of 11817 2.94490987560294%	0.524371	1	1.0041
Protein processing in endoplasmic reticulum	ko04141	35 out of 744 4.70430107526882%	581 out of 11817 4.91664551070492%	0.634603	1	0.956811
alpha-Linolenic acid metabolism	ko00592	7 out of 744 0.940860215053763%	117 out of 11817 0.99009900990099%	0.610531	1	0.950269
Biosynthesis of unsaturated fatty acids	ko01040	4 out of 744 0.537634408602151%	67 out of 11817 0.566979774900567%	0.615922	1	0.948243
Peroxisome	ko04146	13 out of 744 1.74731182795699%	220 out of 11817 1.86172463400186%	0.634574	1	0.938545
Fatty acid biosynthesis	ko00061	6 out of 744 0.806451612903226%	114 out of 11817 0.964711855800965%	0.731232	1	0.835951
Regulation of autophagy	ko04140	4 out of 744 0.537634408602151%	77 out of 11817 0.651603621900652%	0.722805	1	0.825094
Tropane, piperidine and pyridine alkaloid biosynthesis	ko00960	3 out of 744 0.403225806451613%	58 out of 11817 0.490818312600491%	0.716263	1	0.821538
Cutin, suberine and wax biosynthesis	ko00073	4 out of 744 0.537634408602151%	80 out of 11817 0.676990776000677%	0.750183	1	0.794153
Biosynthesis of amino acids	ko01230	29 out of 744 3.89784946236559%	580 out of 11817 4.90818312600491%	0.923858	1	0.794153
Tyrosine metabolism	ko00350	5 out of 744 0.672043010752688%	100 out of 11817 0.846238470000846%	0.762768	1	0.794153
Phenylalanine metabolism	ko00360	5 out of 744 0.672043010752688%	101 out of 11817 0.854700854700855%	0.770327	1	0.78629
Diterpenoid biosynthesis	ko00904	4 out of 744 0.537634408602151%	81 out of 11817 0.685453160700685%	0.758835	1	0.784349
ABC transporters	ko02010	3 out of 744 0.403225806451613%	62 out of 11817 0.524667851400525%	0.757643	1	0.768535
Valine, leucine and isoleucine degradation	ko00280	7 out of 744 0.940860215053763%	145 out of 11817 1.22704578150123%	0.815222	1	0.766769
Glycine, serine and threonine metabolism	ko00260	8 out of 744 1.0752688172043%	166 out of 11817 1.4047558602014%	0.828313	1	0.765449
Fatty acid metabolism	ko01212	9 out of 744 1.20967741935484%	188 out of 11817 1.59092832360159%	0.844613	1	0.760359
Linoleic acid metabolism	ko00591	2 out of 744 0.268817204301075%	42 out of 11817 0.355420157400355%	0.751579	1	0.756336
Steroid biosynthesis	ko00100	4 out of 744 0.537634408602151%	84 out of 11817 0.710840314800711%	0.783398	1	0.756336
Starch and sucrose metabolism	ko00500	26 out of 744 3.49462365591398%	560 out of 11817 4.73893543200474%	0.963698	1	0.737428
Phenylalanine, tyrosine and tryptophan biosynthesis	ko00400	5 out of 744 0.672043010752688%	118 out of 11817 0.998561394600999%	0.872245	1	0.673011
Endocytosis	ko04144	18 out of 744 2.41935483870968%	442 out of 11817 3.74037403740374%	0.984974	1	0.646822
Biotin metabolism	ko00780	2 out of 744 0.268817204301075%	50 out of 11817 0.423119235000423%	0.831813	1	0.635323
Nicotinate and nicotinamide metabolism	ko00760	2 out of 744 0.268817204301075%	50 out of 11817 0.423119235000423%	0.831813	1	0.635323
Isoquinoline alkaloid biosynthesis	ko00950	2 out of 744 0.268817204301075%	56 out of 11817 0.473893543200474%	0.875779	1	0.567252
Aminoacyl-tRNA biosynthesis	ko00970	6 out of 744 0.806451612903226%	171 out of 11817 1.44706778370145%	0.962477	1	0.557301
Vitamin B6 metabolism	ko00750	1 out of 744 0.134408602150538%	29 out of 11817 0.245409156300245%	0.848651	1	0.547692
Arginine biosynthesis	ko00220	3 out of 744 0.403225806451613%	87 out of 11817 0.736227468900736%	0.917916	1	0.547692
Protein export	ko03060	4 out of 744 0.537634408602151%	117 out of 11817 0.99009900990099%	0.942111	1	0.543011
N-Glycan biosynthesis	ko00510	4 out of 744 0.537634408602151%	118 out of 11817 0.998561394600999%	0.944562	1	0.538409
RNA degradation	ko03018	9 out of 744 1.20967741935484%	274 out of 11817 2.31869340780232%	0.991435	1	0.521706
Histidine metabolism	ko00340	2 out of 744 0.268817204301075%	62 out of 11817 0.524667851400525%	0.908927	1	0.512357
Phagosome	ko04145	7 out of 744 0.940860215053763%	220 out of 11817 1.86172463400186%	0.987314	1	0.50537
SNARE interactions in vesicular transport	ko04130	3 out of 744 0.403225806451613%	99 out of 11817 0.837776085300838%	0.953364	1	0.481305
Pentose and glucuronate interconversions	ko00040	8 out of 744 1.0752688172043%	265 out of 11817 2.24253194550224%	0.994954	1	0.479489
Inositol phosphate metabolism	ko00562	5 out of 744 0.672043010752688%	171 out of 11817 1.44706778370145%	0.985303	1	0.464417
Pantothenate and CoA biosynthesis	ko00770	2 out of 744 0.268817204301075%	72 out of 11817 0.609291698400609%	0.946445	1	0.441196
Propanoate metabolism	ko00640	3 out of 744 0.403225806451613%	108 out of 11817 0.913937547600914%	0.969928	1	0.441196
Ubiquitin mediated proteolysis	ko04120	9 out of 744 1.20967741935484%	343 out of 11817 2.9025979521029%	0.999512	1	0.416757
Pyruvate metabolism	ko00620	6 out of 744 0.806451612903226%	233 out of 11817 1.97173563510197%	0.997376	1	0.409006
Fatty acid elongation	ko00062	2 out of 744 0.268817204301075%	78 out of 11817 0.66006600660066%	0.961321	1	0.407258
Purine metabolism	ko00230	8 out of 744 1.0752688172043%	389 out of 11817 3.29186764830329%	0.999983	1	0.326644
mRNA surveillance pathway	ko03015	6 out of 744 0.806451612903226%	316 out of 11817 2.67411356520267%	0.999955	1	0.301577
Basal transcription factors	ko03022	2 out of 744 0.268817204301075%	112 out of 11817 0.947787086400948%	0.994298	1	0.283626
Valine, leucine and isoleucine biosynthesis	ko00290	1 out of 744 0.134408602150538%	67 out of 11817 0.566979774900567%	0.987344	1	0.237061
Ribosome biogenesis in eukaryotes	ko03008	3 out of 744 0.403225806451613%	215 out of 11817 1.81941271050182%	0.999908	1	0.221624
Lysine degradation	ko00310	1 out of 744 0.134408602150538%	74 out of 11817 0.626216467800626%	0.991994	1	0.214636
2-Oxocarboxylic acid metabolism	ko01210	2 out of 744 0.268817204301075%	153 out of 11817 1.29474485910129%	0.99949	1	0.207622
Zeatin biosynthesis	ko00908	1 out of 744 0.134408602150538%	86 out of 11817 0.727765084200728%	0.996351	1	0.184687
RNA transport	ko03013	5 out of 744 0.672043010752688%	465 out of 11817 3.93500888550393%	1	1	0.170786
Pyrimidine metabolism	ko00240	3 out of 744 0.403225806451613%	306 out of 11817 2.58948971820259%	1	1	0.155716
Base excision repair	ko03410	1 out of 744 0.134408602150538%	119 out of 11817 1.00702377930101%	0.999581	1	0.133471
Mismatch repair	ko03430	1 out of 744 0.134408602150538%	138 out of 11817 1.16780908860117%	0.99988	1	0.115095
Homologous recombination	ko03440	1 out of 744 0.134408602150538%	145 out of 11817 1.22704578150123%	0.999924	1	0.109538
Ribosome	ko03010	5 out of 744 0.672043010752688%	787 out of 11817 6.65989675890666%	1	1	0.100909
Proteasome	ko03050	1 out of 744 0.134408602150538%	164 out of 11817 1.38783109080139%	0.999978	1	0.096848
DNA replication	ko03030	1 out of 744 0.134408602150538%	169 out of 11817 1.43014301430143%	0.999984	1	0.0939826
Nucleotide excision repair	ko03420	1 out of 744 0.134408602150538%	195 out of 11817 1.65016501650165%	0.999997	1	0.0814516
Spliceosome	ko03040	2 out of 744 0.268817204301075%	497 out of 11817 4.20580519590421%	1	1	0.0639158
Oxidative phosphorylation	ko00190	1 out of 744 0.134408602150538%	330 out of 11817 2.79258695100279%	1	1	0.0481305
